# Supplementary material
Source: Elsevier journal article supplement (https://www.sciencedirect.com/science/article/pii/S1885585725003160)
Supplement: mmc1 [file mmc1.pdf]

**SUPPLEMENTARY DATA**

**Table S1.** Definitions for TAVR and SGLT2i exposure

| Component                            | Criterion type                                                        | Coding system | Code    | Description                                                                              |
|--------------------------------------|-----------------------------------------------------------------------|---------------|---------|------------------------------------------------------------------------------------------|
| <b>A. TAVR group definition</b>      |                                                                       |               |         |                                                                                          |
| <i>TAVR procedure</i>                | Must have any of the following procedures on or after January 1, 2015 | CPT           | 33361   | TAVR with prosthetic valve; percutaneous femoral artery approach                         |
|                                      |                                                                       | CPT           | 33362   | TAVR with prosthetic valve; open femoral artery approach                                 |
|                                      |                                                                       | CPT           | 33363   | TAVR with prosthetic valve; open axillary artery approach                                |
|                                      |                                                                       | CPT           | 33364   | TAVR with prosthetic valve; open iliac artery approach                                   |
|                                      |                                                                       | CPT           | 33365   | TAVR with prosthetic valve; transaortic approach (eg, median sternotomy, mediastinotomy) |
|                                      |                                                                       | CPT           | 33366   | TAVR with prosthetic valve; transapical exposure (eg, left thoracotomy)                  |
|                                      |                                                                       | CPT           | 33367   | TAVR with prosthetic valve; CPB support with percutaneous peripheral cannulation         |
|                                      |                                                                       | CPT           | 33368   | TAVR with prosthetic valve; CPB support with open peripheral cannulation                 |
|                                      |                                                                       | CPT           | 33369   | TAVR with prosthetic valve; CPB support with central cannulation                         |
|                                      |                                                                       | ICD-10-PCS    | 02RF37Z | Replacement of aortic valve with autologous tissue substitute, percutaneous approach     |
|                                      |                                                                       | ICD-10-PCS    | 02RF38Z | Replacement of aortic valve with zooplastic tissue, percutaneous approach                |
|                                      |                                                                       | ICD-10-PCS    | 02RF3JZ | Replacement of aortic valve with synthetic substitute, percutaneous approach             |
|                                      |                                                                       | ICD-10-PCS    | 02RF3KZ | Replacement of aortic valve with nonautologous tissue substitute, percutaneous approach  |
| <b>B. SGLT2i exposure definition</b> |                                                                       |               |         |                                                                                          |
| <i>SGLT2i exposure</i>               | Any of the following medications prescribed                           | RxNorm        | 1545653 | Empagliflozin                                                                            |
|                                      |                                                                       | RxNorm        | 1992672 | Ertugliflozin                                                                            |
|                                      |                                                                       | RxNorm        | 1373458 | Canagliflozin                                                                            |

|  |  |        |         |               |
|--|--|--------|---------|---------------|
|  |  | RxNorm | 1488564 | Dapagliflozin |
|--|--|--------|---------|---------------|

**Table S2.** Baseline characteristics and associated codes

| Variable                                    | Coding system | Code            | Description                                           |
|---------------------------------------------|---------------|-----------------|-------------------------------------------------------|
| <i>A. Demographic variables</i>             |               |                 |                                                       |
| Age                                         | N/A           | Current age     | Age at time of data extraction                        |
| Age at index                                | N/A           | AI              | Age at index event date                               |
| Sex                                         | N/A           | F               | Female                                                |
| Sex                                         | N/A           | M               | Male                                                  |
| Race                                        | HL7           | 2054-5          | Black or African American                             |
| Race                                        | HL7           | 2106-3          | White                                                 |
| Race                                        | HL7           | 1002-5          | American Indian or Alaska Native                      |
| Race                                        | HL7           | 2076-8          | Native Hawaiian or Other Pacific Islander             |
| Race                                        | HL7           | 2028-9          | Asian                                                 |
| Race                                        | HL7           | 2131-1          | Other Race                                            |
| Race                                        | HL7           | UNK             | Unknown Race                                          |
| Ethnicity                                   | HL7           | 2186-5          | Not Hispanic or Latino                                |
| Ethnicity                                   | HL7           | 2135-2          | Hispanic or Latino                                    |
| Ethnicity                                   | HL7           | UN              | Unknown Ethnicity                                     |
| Diagnosis                                   | Coding system | Code Range/Code | Description                                           |
| <i>B. Clinical diagnoses (ICD-10 codes)</i> |               |                 |                                                       |
| Hypertension                                | ICD-10        | I10–I1A         | Hypertensive diseases                                 |
| Hypertension (legacy)                       | ICD-10        | I10–I15         | Deprecated classification pre-2018                    |
| Diabetes mellitus                           | ICD-10        | E08–E13         | Diabetes mellitus                                     |
| Obesity                                     | ICD-10        | E65–E68         | Overweight, obesity, and other hyperalimentation      |
| Arterial disease                            | ICD-10        | I70–I79         | Arterial, arteriolar, and capillary diseases          |
| Carotid stenosis                            | ICD-10        | I65             | Precerebral artery occlusion, no infarction           |
| Venous disease                              | ICD-10        | I80–I89         | Diseases of veins, lymphatic vessels, and lymph nodes |
| COPD and CLRD                               | ICD-10        | J40–J4A         | Chronic lower respiratory diseases                    |
| Liver disease                               | ICD-10        | K70–K77         | Diseases of the liver                                 |
| HFpEF                                       | ICD-10        | I50.3           | Diastolic (congestive) heart failure                  |
| HFrEF                                       | ICD-10        | I50.2           | Systolic (congestive) heart failure                   |

|                                                 |         |                                    |                                               |
|-------------------------------------------------|---------|------------------------------------|-----------------------------------------------|
| HFmrEF                                          | ICD-10  | I50.4                              | Combined systolic and diastolic heart failure |
| CKD                                             | ICD-10  | N18                                | Chronic kidney disease                        |
| Chronic ischemia                                | ICD-10  | I25                                | Chronic ischemic heart disease                |
| TIA history                                     | ICD-10  | Z86.73                             | History of TIA or stroke without deficits     |
| SCA history                                     | ICD-10  | Z86.74                             | History of sudden cardiac arrest              |
| Other CV history                                | ICD-10  | Z86.79                             | Other circulatory system disease history      |
| Smoking                                         | ICD-10  | F17                                | Nicotine dependence                           |
| Dyslipidemia                                    | ICD-10  | E78                                | Lipoprotein metabolism disorders              |
| CAD                                             | ICD-10  | I20–I25                            | Ischemic heart diseases                       |
| Stroke                                          | ICD-10  | I60–I69                            | Cerebrovascular diseases                      |
|                                                 |         |                                    |                                               |
| <i>C. Medication use (TrinetX drug classes)</i> |         |                                    |                                               |
| Statins                                         | TriNetX | CV350                              | Antilipemic agents                            |
| Diuretics                                       | TriNetX | CV700                              | Diuretics                                     |
| Antiarrhythmics                                 | TriNetX | CV300                              | Antiarrhythmics                               |
| Beta-blockers                                   | TriNetX | CV100                              | Beta blockers and related drugs               |
| Nitrates                                        | TriNetX | CV250                              | Antianginal agents                            |
| ARBs                                            | TriNetX | CV805                              | Angiotensin II receptor blockers              |
| ACE Inhibitors                                  | TriNetX | CV800                              | ACE inhibitors                                |
| Other antihypertensives                         | TriNetX | CV490                              | Other antihypertensive agents                 |
| Alpha-blockers                                  | TriNetX | CV150                              | Alpha blockers and related agents             |
| Combination therapy                             | TriNetX | CV400                              | Antihypertensive combinations                 |
| Digoxin                                         | TriNetX | CV050                              | Digitalis glycosides                          |
| Vasodilators                                    | TriNetX | CV500                              | Peripheral vasodilators                       |
| Renin inhibitors                                | TriNetX | CV806                              | Direct renin inhibitors                       |
| Calcium channel blockers                        | TriNetX | CV200                              | Calcium channel blockers                      |
|                                                 |         |                                    |                                               |
| <i>D. Laboratory variables (LOINC codes)</i>    |         |                                    |                                               |
| <i>eGFR (MDRD)</i>                              | 8001    | Creatinine-based GFR estimate      | mL/min/1.73 m <sup>2</sup>                    |
| <i>BUN</i>                                      | 9030    | Urea nitrogen in serum/plasma      | mg/dL                                         |
| <i>Hemoglobin</i>                               | 9014    | Hemoglobin concentration in blood  | g/dL                                          |
| <i>Hematocrit</i>                               | 9013    | Hematocrit percentage              | %                                             |
|                                                 | 9003    | B-type natriuretic peptide         | pg/mL                                         |
| <i>NT-proBNP</i>                                | 9072    | N-terminal proBNP                  | pg/mL                                         |
| <i>HbA1c</i>                                    | 9037    | Hemoglobin A1c                     | %                                             |
| <i>LVEF</i>                                     | 2003    | Left ventricular ejection fraction | %                                             |
| <i>BMI</i>                                      | 9083    | Body mass index                    | kg/m <sup>2</sup>                             |

**Table S4.** Baseline characteristics before matching

| Variable                         | SGLT2i group (n = 3145) | Non-SGLT2i group (n = 55 048) | P      |
|----------------------------------|-------------------------|-------------------------------|--------|
| <i>Demographics</i>              |                         |                               |        |
| Age, y                           | 75.2 ± 9.1              | 78.6 ± 8.7                    | < .001 |
| Female sex                       | 975 (31.0)              | 23010 (41.8)                  | < .001 |
| Male sex                         | 2044 (65.0)             | 29341 (53.3)                  | < .001 |
| White                            | 2466 (78.4)             | 44699 (81.2)                  | < .001 |
| Black or African American        | 179 (5.7)               | 2697 (4.9)                    | .048   |
| Asian                            | 126 (4.0)               | 1541 (2.8)                    | < .001 |
| American Indian or Alaska Native | 9 (0.3)                 | 55 (0.1)                      | .020   |
| Other race                       | 82 (2.6)                | 936 (1.7)                     | <.001  |
| Unknown race                     | 258 (8.2)               | 4844 (8.8)                    | .217   |
| Hispanic or Latino               | 148 (4.7)               | 2037 (3.7)                    | .007   |
| Not Hispanic or Latino           | 2510 (79.8)             | 45029 (81.8)                  | .005   |
| Unknown ethnicity                | 487 (15.5)              | 7927 (14.4)                   | .107   |
| Other race                       | 82 (2.6)                | 936 (1.7)                     | < .001 |
| Unknown race                     | 258 (8.2)               | 4844 (8.8)                    | .217   |
| BMI, kg/m <sup>2</sup>           | 30.0 ± 6.9              | 29.1 ± 6.7                    | < .001 |

|                                  |             |              |        |
|----------------------------------|-------------|--------------|--------|
| <i>Comorbidities</i>             |             |              |        |
| Hypertensive diseases            | 2746 (87.3) | 45635 (82.9) | < .001 |
| Diabetes mellitus                | 1984 (63.1) | 18441 (33.5) | < .001 |
| Obesity                          | 1283 (40.8) | 13707 (24.9) | < .001 |
| Chronic respiratory disease      | 1148 (36.5) | 16790 (30.5) | < .001 |
| Chronic kidney disease           | 1396 (44.4) | 18331 (33.3) | < .001 |
| Chronic ischemic heart disease   | 2620 (83.3) | 41176 (74.8) | < .001 |
| Systolic HF                      | 1623 (51.6) | 11175 (20.3) | < .001 |
| Diastolic HF                     | 1604 (51.0) | 24441 (44.4) | < .001 |
| Combined systolic & diastolic HF | 966 (30.7)  | 7376 (13.4)  | < .001 |
| Nicotine dependence              | 450 (14.3)  | 4459 (8.1)   | < .001 |
| Lipid disorders                  | 2554 (81.2) | 39635 (72.0) | < .001 |
| Cerebrovascular diseases         | 940 (29.9)  | 16735 (30.4) | .489   |

|                                            |             |              |        |
|--------------------------------------------|-------------|--------------|--------|
| History of TIA/cerebral infarction         | 387 (12.3)  | 5395 (9.8)   | < .001 |
| History of sudden cardiac arrest           | 41 (1.3)    | 330 (0.6)    | < .001 |
| History of other circulatory disease       | 443 (14.1)  | 4184 (7.6)   | < .001 |
| Diseases of arteries                       | 1661 (52.8) | 27359 (49.7) | .001   |
| Occlusion/stenosis of precerebral arteries | 670 (21.3)  | 12331 (22.4) | .136   |
| Diseases of veins/lymphatics               | 660 (21.0)  | 8147 (14.8)  | < .001 |
| Diseases of liver                          | 566 (18.0)  | 5890 (10.7)  | < .001 |

|                          |             |              |        |
|--------------------------|-------------|--------------|--------|
| <i>Medications</i>       |             |              |        |
| Statin use               | 2730 (86.8) | 37873 (68.8) | < .001 |
| Beta-blocker use         | 2617 (83.2) | 34515 (62.7) | < .001 |
| Diuretic use             | 2702 (85.9) | 33634 (61.1) | < .001 |
| ACE inhibitor or ARB use | 2743(87.2)  | 30606 (55.6) | < .001 |
| Other antihypertensives  | 1249 (39.7) | 13487 (24.5) | < .001 |
| Alpha-blockers           | 840 (26.7)  | 10074 (18.3) | < .001 |
| Calcium channel blockers | 2025 (64.4) | 30111 (54.7) | < .001 |
| Digitalis glycosides     | 258 (8.2)   | 2862 (5.2)   | < .001 |

|                            |                 |                 |        |
|----------------------------|-----------------|-----------------|--------|
| <i>Laboratory values</i>   |                 |                 |        |
| Hemoglobin A1c             | 6.7 ± 1.5       | 6.1 ± 1.2       | < .001 |
| Glomerular filtration rate | 61.8 ± 25.1     | 59.8 ± 24.9     | < .001 |
| Urea nitrogen, mg/dL       | 26.7 ± 13.7     | 24.8 ± 13.3     | < .001 |
| Hemoglobin, g/dL           | 12.0 ± 2.3      | 12.2 ± 2.0      | < .001 |
| Hematocrit                 | 37.0 ± 7.0      | 37.2 ± 6.1      | < .001 |
| BNP, pg/mL                 | 1484.0 ± 3649.7 | 1169.7 ± 4072.9 | .004   |
| NT-proBNP, pg/mL           | 5990.1 ± 8748.0 | 4968.5 ± 9638.3 | < .001 |
| LVEF                       | 48.4 ± 17.5     | 56.4 ± 13.9     | < .001 |

The data are expressed as No. (%) or mean ± standard deviation.

**Table S5.** All-cause mortality at 3, 6, and 12 months and 5 years

| Timepoint | SGLT2i cohort mortality | Non-SGLT2i antihyperglycemics mortality | Hazard ratio [95%CI] | <i>P</i> |
|-----------|-------------------------|-----------------------------------------|----------------------|----------|
| 3 mo      | 51 (3.5)                | 71 (4.8)                                | 0.75 [0.52-.07]      | .108     |
| 6 mo      | 78 (5.3)                | 101 (6.8)                               | 0.81 [0.60-1.09]     | .161     |
| 12 mo     | 112 (7.6)               | 153 (10.4)                              | 0.78 [0.61-0.99]     | .044     |
| 5 y       | 167 (11.3)              | 298 (20.2)                              | 0.69 [0.57-0.83]     | < .001   |

Unless otherwise indicated, the data are expressed as No. (%).

**Table S6.** Secondary outcomes

| Outcome                      | Time  | SGLT2i cohort | Non-SGLT2i antihyperglycemics cohort | Odds ratio (95%CI) | <i>P</i> |
|------------------------------|-------|---------------|--------------------------------------|--------------------|----------|
| Heart failure                | 3 mo  | 73 (4.9)      | 54 (3.7)                             | 1.37 (0.96-1.96)   | .085     |
|                              | 6 mo  | 81 (5.5)      | 63 (4.3)                             | 1.30 (0.93-1.83)   | .124     |
|                              | 12 mo | 88 (6)        | 72(4.9)                              | 1.24 (0.90-1.70)   | .193     |
|                              | 5 y   | 96 (6.5)      | 86 (5.8)                             | 1.12 (0.83-1.52)   | .444     |
| ED visits or hospitalization | 3 mo  | 469 (31.8)    | 694 (47.1)                           | 0.53 (0.45-0.61)   | < .001   |
|                              | 6 mo  | 521 (35.3)    | 758 (51.4)                           | 0.52 (0.45-0.60)   | < .001   |
|                              | 12 mo | 587 (39.8)    | 821 (55.7)                           | 0.53 (0.46-0.61)   | < .001   |
|                              | 5 y   | 681 (46.2)    | 890 (60.3)                           | 0.56 (0.49-0.65)   | < .001   |
| Ventricular tachycardia      | 3 mo  | 19 (1.5)      | 26 (1.9)                             | 0.76 (0.42-1.38)   | .360     |
|                              | 6 mo  | 23 (1.8)      | 36 (2.7)                             | 0.66 (0.39-1.12)   | .120     |
|                              | 12 mo | 37 (2.9)      | 43(3.2)                              | 0.89(0.57-1.40)    | .619     |
|                              | 5 y   | 54 (4.2)      | 58 (4.3)                             | 0.97 (0.66-1.41)   | .867     |
| Atrial fibrillation/flutter  | 3 mo  | 52 (6.6)      | 62 (8.1)                             | 0.80 (0.54-1.17)   | .246     |
|                              | 6 mo  | 58 (7.4)      | 73 (9.6)                             | 0.75 (0.52-1.08)   | .116     |
|                              | 12 mo | 68 (8.6)      | 92 (12.1)                            | 0.67 (0.50-0.96)   | .026     |
|                              | 5 y   | 92 (11.7)     | 123 (16.2)                           | 0.69 (0.51-0.92)   | .011     |
| Acute MI                     | 3 mo  | 94 (6.4)      | 117 (7.9)                            | 0.79 (0.60-1.05)   | .100     |
|                              | 6 mo  | 105 (7.1)     | 137 (9.3)                            | 0.75 (0.57-0.98)   | .032     |
|                              | 12 mo | 134 (9.1)     | 165(11.2)                            | 0.79(0.62-1.01)    | .059     |
|                              | 5 y   | 165 (11.2)    | 223 (15.1)                           | 0.71(0.57-0.88)    | .002     |
| Stroke                       | 3 mo  | 58(3.9)       | 67(4.5)                              | 0.86(0.61-1.22)    | .411     |
|                              | 6 mo  | 72 (4.9)      | 86 (5.8)                             | 0.84(0.62-1.14)    | .252     |

|          |       |            |            |                  |      |
|----------|-------|------------|------------|------------------|------|
|          | 12 mo | 88 (6 )    | 112 (7.6)  | 0.77 (0.58-1.03) | .079 |
|          | 5 y   | 114 (7.7)  | 148 (10)   | 0.75 (0.58-0.97) | .028 |
| AKI      | 3 mo  | 166 (11.3) | 185 (12.5) | 0.88 (0.71-1.11) | .280 |
|          | 6 mo  | 195 (13.2) | 235 (15.9) | 0.80 (0.66-0.99) | .037 |
|          | 12 mo | 239 (16.2) | 299 (20.3) | 0.76 (0.63-0.92) | .004 |
|          | 5 y   | 303 (20.5) | 382 (25.9) | 0.74(0.62-0.89)  | .001 |
| Dialysis | 3 mo  | 10 (0.7)   | 16 (1.2)   | 0.56 (0.25-1.24) | .148 |
|          | 6 mo  | 11 (0.8)   | 22 (1.7)   | 0.45 (0.22-0.93) | .026 |
|          | 12 mo | 16 (1.1)   | 28(2.2)    | 0.51 (0.28-0.95) | .030 |
|          | 5 y   | 28 (2.0)   | 46 (3.6)   | 0.54 (0.34-0.87) | .010 |

**Figure S1. Distribution of follow-up durations after TAVR in patients with and without SGLT2i.**

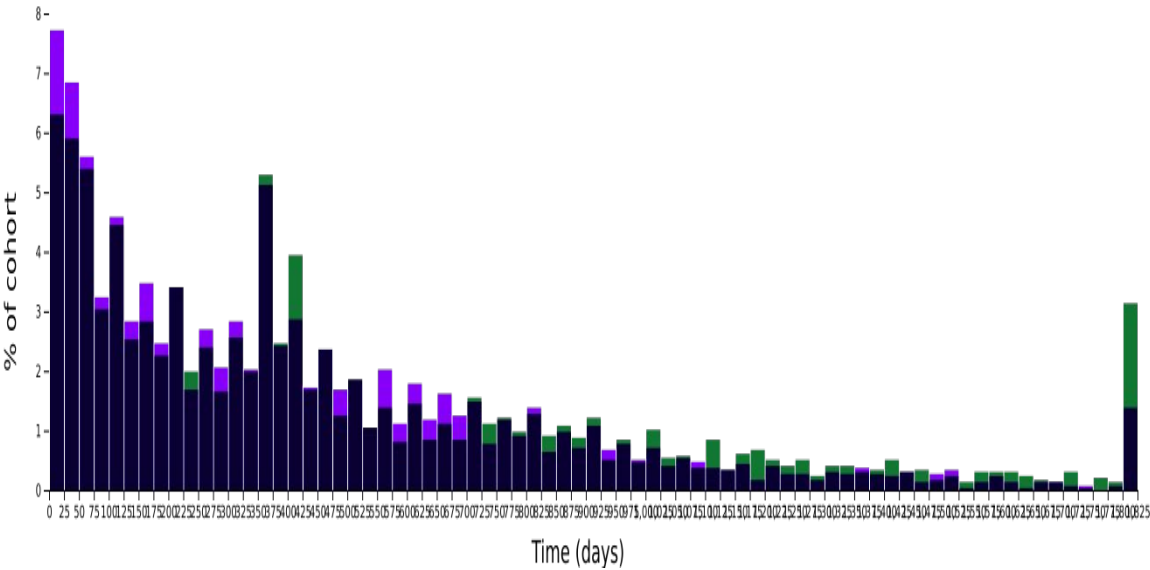

Bar graph displaying the percentage of patients in each cohort with available follow-up data at each time point after transcatheter aortic valve replacement (TAVR). Purple bars represent the SGLT2i cohort, and green bars represent the non-SGLT2i cohort. This figure illustrates the distribution of follow-up duration and highlights differences in longitudinal data availability between the 2 groups.

**Figure S2.** Kaplan-Meier curve for all-cause mortality up to 5 years following transcatheter aortic valve replacement (TAVR) in patients with heart failure on SGLT2i vs non-SGLT2i antihyperglycemics. Log-rank test: chi-square = 15.02, degrees of freedom = 1,  $P < .001$ .

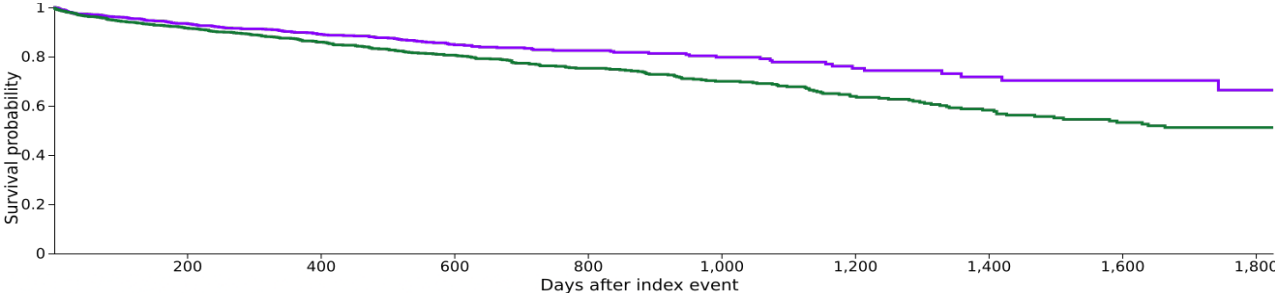

**Number at Risk**

|                                          | 90    | 180   | 365   | 1800  |
|------------------------------------------|-------|-------|-------|-------|
| <b>SGLT2i</b>                            | 1,424 | 1,397 | 1,363 | 1,308 |
| <b>Non-SGLT2i<br/>Antihyperglycemics</b> | 1,404 | 1,374 | 1,322 | 1,177 |
